# Supplementary material for: Metformin Shortens Prolonged QT Interval in Diabetic Mice by Inhibiting L-Type Calcium Current: A Possible Therapeutic Approach
Source: PubMed Central journal article supplement (PMC7300225; doi:10.3389/fphar.2020.00614), 2020-06-11

Supplementary Material

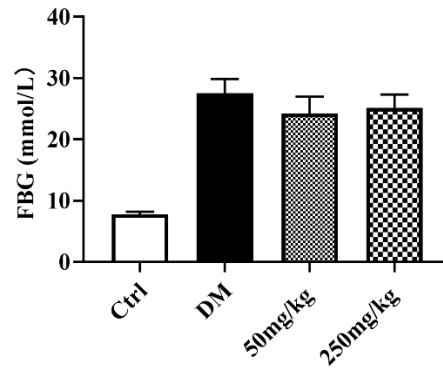

Fig.S1. The effect of FMT on hyperglycemia in diabetic mice after 4 weeks treatment.  $n_{Ctrl} = n_{DM} = n_{Metformin} = 6$ .

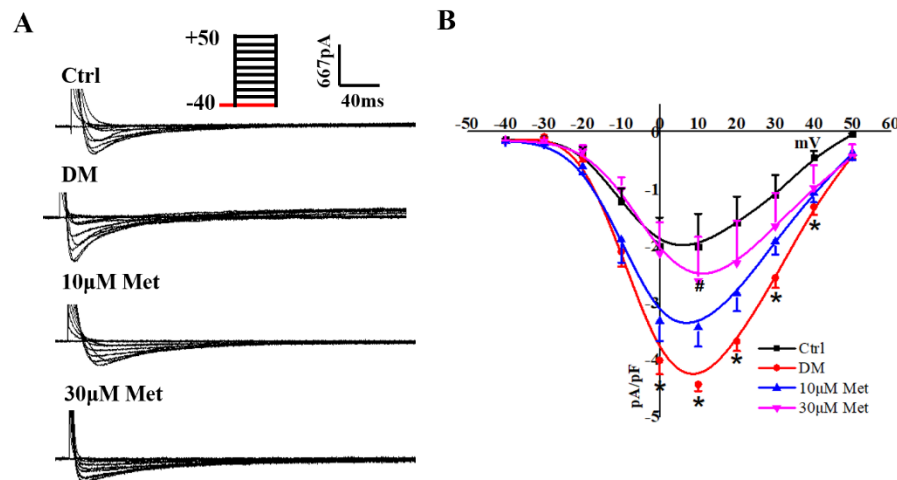

Fig.S2. The effect of FMT on  $I_{Ca-L}$  in acutely isolated cardiomyocytes of diabetic mice. (A) Representative  $I_{Ca-L}$  traces in the Ctrl group, DM group, and the metformin-treatment group. The holding potential was -40mV. (E) I-V curves of  $I_{Ca-L}$  in the Ctrl group, DM group, and the metformin-treatment group. Values represent mean  $\pm$  SEM,  $n_{Ctrl} = n_{DM} = n_{Metformin} = 6$ . \* $P < 0.05$  versus Ctrl, #  $P < 0.05$  versus DM.

**Table S1 The RR interval**

| Group        | RR interval (ms) |
|--------------|------------------|
| Ctrl         | 142.38±21.24     |
| DM           | 156±28.59        |
| 50mg/kg Met  | 142.23±21.32     |
| 250mg/kg Met | 141.06±24.49     |

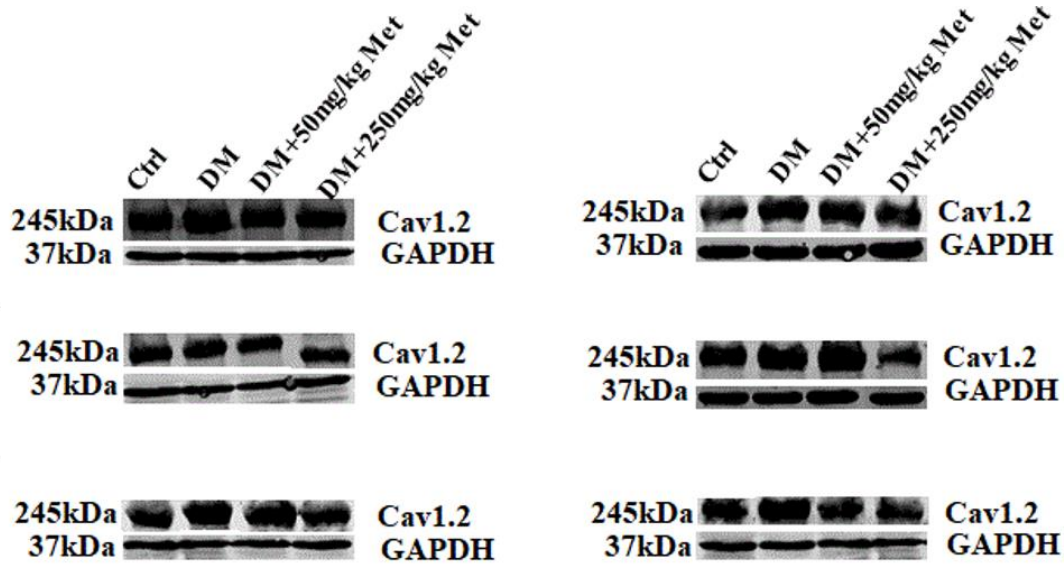

Supplement: DataSheet_1.pdf [file DataSheet_1.pdf]
